# Supplementary material for: Assessment of temperature and time on the survivability of porcine reproductive and respiratory syndrome virus (PRRSV) and porcine epidemic diarrhea virus (PEDV) on experimentally contaminated surfaces
Source: PubMed Central journal article supplement (PMC10798431; doi:10.1371/journal.pone.0291181), 2024-01-19
Supplement: pone.0291181.s001.pdf [file pone.0291181.s001.pdf]

**S1 Table. PRRSV titration results.**

| Study group       | Series #  | ATCID    | BTCID    | CTCID    | Average TCID | A LOG | B LOG | C LOG | Average LOG | Surface   | Contact time (min) | Temperature (°F) | Temperature (°C) |
|-------------------|-----------|----------|----------|----------|--------------|-------|-------|-------|-------------|-----------|--------------------|------------------|------------------|
| Negative Control  | 1<br>A-C  | 0.00E+00 | 0.00E+00 | 0.00E+00 | 0.00E+00     | 0.00  | 0.00  | 0.00  | 0.00        | Cardboard | 2160               | 68°F             | 20°C             |
| Negative Control  | 2<br>A-C  | 0.00E+00 | 0.00E+00 | 0.00E+00 | 0.00E+00     | 0.00  | 0.00  | 0.00  | 0.00        | Aluminum  | 2160               | 68°F             | 20°C             |
| PRRSV MN 1-8-4    | 3<br>A-C  | 3.16E+03 | 3.16E+03 | 1.78E+04 | 5.62E+03     | 3.50  | 3.50  | 4.25  | 3.75        | Cardboard | 15                 | 68°F             | 20°C             |
| PRRSV MN 1-8-4    | 4<br>A-C  | 3.16E+04 | 3.16E+04 | 3.16E+04 | 3.16E+04     | 4.50  | 4.50  | 4.50  | 4.50        | Aluminum  | 15                 | 68°F             | 20°C             |
| PRRSV 1-4-4 L1C V | 5<br>A-C  | 5.62E+02 | 3.16E+03 | 1.78E+03 | 1.47E+03     | 2.75  | 3.50  | 3.25  | 3.17        | Cardboard | 15                 | 68°F             | 20°C             |
| PRRSV 1-4-4 L1C V | 6<br>A-C  | 3.16E+03 | 3.16E+03 | 3.16E+03 | 3.16E+03     | 3.50  | 3.50  | 3.50  | 3.50        | Aluminum  | 15                 | 68°F             | 20°C             |
| PRRSV MN 1-8-4    | 9<br>A-C  | 3.16E+03 | 3.16E+03 | 5.62E+03 | 3.83E+03     | 3.50  | 3.50  | 3.75  | 3.58        | Cardboard | 60                 | 68°F             | 20°C             |
| PRRSV MN 1-8-4    | 10<br>A-C | 1.78E+04 | 1.78E+04 | 3.16E+04 | 2.16E+04     | 4.25  | 4.25  | 4.50  | 4.33        | Aluminum  | 60                 | 68°F             | 20°C             |
| PRRSV 1-4-4 L1C V | 11<br>A-C | 4.64E+02 | 1.78E+03 | 3.16E+02 | 6.39E+02     | 2.67  | 3.25  | 2.50  | 2.81        | Cardboard | 60                 | 68°F             | 20°C             |
| PRRSV 1-4-4 L1C V | 12<br>A-C | 5.62E+03 | 6.81E+03 | 1.78E+04 | 8.80E+03     | 3.75  | 3.83  | 4.25  | 3.94        | Aluminum  | 60                 | 68°F             | 20°C             |
| PRRSV MN 1-8-4    | 15<br>A-C | 3.16E+02 | 1.78E+03 | 5.62E+02 | 6.81E+02     | 2.50  | 3.25  | 2.75  | 2.83        | Cardboard | 360                | 68°F             | 20°C             |
| PRRSV MN 1-8-4    | 16<br>A-C | 4.64E+03 | 3.16E+03 | 5.62E+03 | 4.35E+03     | 3.67  | 3.50  | 3.75  | 3.64        | Aluminum  | 360                | 68°F             | 20°C             |
| PRRSV 1-4-4 L1C V | 17<br>A-C | 0.00E+00 | 3.16E+01 | 0.00E+00 | 3.16E+00     | 0.00  | 1.50  | 0.00  | 0.50        | Cardboard | 360                | 68°F             | 20°C             |
| PRRSV 1-4-4 L1C V | 18<br>A-C | 1.00E+03 | 1.78E+03 | 3.16E+03 | 1.78E+03     | 3.00  | 3.25  | 3.50  | 3.25        | Aluminum  | 360                | 68°F             | 20°C             |
| PRRSV MN 1-8-4    | 21<br>A-C | 3.16E+02 | 1.00E+03 | 3.16E+02 | 4.64E+02     | 2.50  | 3.00  | 2.50  | 2.67        | Cardboard | 1440               | 68°F             | 20°C             |
| PRRSV MN 1-8-4    | 22<br>A-C | 1.78E+03 | 5.62E+02 | 5.62E+03 | 1.78E+03     | 3.25  | 2.75  | 3.75  | 3.25        | Aluminum  | 1440               | 68°F             | 20°C             |
| PRRSV 1-4-4 L1C V | 23<br>A-C | 3.16E+01 | 3.16E+01 | 5.62E+01 | 3.83E+01     | 1.50  | 1.50  | 1.75  | 1.58        | Cardboard | 1440               | 68°F             | 20°C             |
| PRRSV 1-4-4 L1C V | 24<br>A-C | 5.62E+02 | 1.78E+02 | 5.62E+02 | 3.83E+02     | 2.75  | 2.25  | 2.75  | 2.58        | Aluminum  | 1440               | 68°F             | 20°C             |
| PRRSV MN 1-8-4    | 27<br>A-C | 1.78E+03 | 1.78E+03 | 5.62E+02 | 1.21E+03     | 3.25  | 3.25  | 2.75  | 3.08        | Cardboard | 720                | 68°F             | 20°C             |
| PRRSV MN 1-8-4    | 28<br>A-C | 5.62E+03 | 3.16E+03 | 3.16E+02 | 1.78E+03     | 3.75  | 3.50  | 2.50  | 3.25        | Aluminum  | 720                | 68°F             | 20°C             |

|                   |        |          |          |          |          |      |      |      |      |           |      |      |      |
|-------------------|--------|----------|----------|----------|----------|------|------|------|------|-----------|------|------|------|
| PRRSV 1-4-4 L1C V | 29 A-C | 3.16E+02 | 3.16E+01 | 3.16E+01 | 6.81E+01 | 2.50 | 1.50 | 1.50 | 1.83 | Cardboard | 720  | 68°F | 20°C |
| PRRSV 1-4-4 L1C V | 30 A-C | 1.00E+03 | 3.16E+03 | 3.16E+03 | 2.15E+03 | 3.00 | 3.50 | 3.50 | 3.33 | Aluminum  | 720  | 68°F | 20°C |
| PRRSV MN 1-8-4    | 33 A-C | 5.62E+02 | 5.62E+02 | 3.16E+02 | 4.64E+02 | 2.75 | 2.75 | 2.50 | 2.67 | Cardboard | 2160 | 68°F | 20°C |
| PRRSV MN 1-8-4    | 34 A-C | 5.62E+02 | 1.78E+03 | 3.16E+03 | 1.47E+03 | 2.75 | 3.25 | 3.50 | 3.17 | Aluminum  | 2160 | 68°F | 20°C |
| PRRSV 1-4-4 L1C V | 35 A-C | 0.00E+00 | 1.78E+01 | 0.00E+00 | 2.61E+00 | 0.00 | 1.25 | 0.00 | 0.42 | Cardboard | 2160 | 68°F | 20°C |
| PRRSV 1-4-4 L1C V | 36 A-C | 3.16E+02 | 3.16E+02 | 5.62E+02 | 3.83E+02 | 2.50 | 2.50 | 2.75 | 2.58 | Aluminum  | 2160 | 68°F | 20°C |
| PRRSV MN 1-8-4    | 39 A-C | 1.78E+04 | 3.16E+04 | 5.62E+03 | 1.47E+04 | 4.25 | 4.50 | 3.75 | 4.17 | Cardboard | 15   | 86°F | 30°C |
| PRRSV MN 1-8-4    | 40 A-C | 1.78E+04 | 5.62E+04 | 5.62E+03 | 1.78E+04 | 4.25 | 4.75 | 3.75 | 4.25 | Aluminum  | 15   | 86°F | 30°C |
| PRRSV 1-4-4 L1C V | 41 A-C | 3.16E+02 | 1.78E+03 | 3.16E+03 | 1.21E+03 | 2.50 | 3.25 | 3.50 | 3.08 | Cardboard | 15   | 86°F | 30°C |
| PRRSV 1-4-4 L1C V | 42 A-C | 3.16E+03 | 5.62E+03 | 1.78E+03 | 3.16E+03 | 3.50 | 3.75 | 3.25 | 3.50 | Aluminum  | 15   | 86°F | 30°C |
| PRRSV MN 1-8-4    | 45 A-C | 1.78E+04 | 3.16E+03 | 3.16E+03 | 5.62E+03 | 4.25 | 3.50 | 3.50 | 3.75 | Cardboard | 60   | 86°F | 30°C |
| PRRSV MN 1-8-4    | 46 A-C | 3.16E+03 | 3.16E+03 | 5.62E+03 | 3.83E+03 | 3.50 | 3.50 | 3.75 | 3.58 | Aluminum  | 60   | 86°F | 30°C |
| PRRSV 1-4-4 L1C V | 47 A-C | 0.00E+00 | 1.00E+02 | 1.78E+02 | 2.61E+01 | 0.00 | 2.00 | 2.25 | 1.42 | Cardboard | 60   | 86°F | 30°C |
| PRRSV 1-4-4 L1C V | 48 A-C | 3.16E+02 | 3.16E+02 | 3.16E+03 | 6.81E+02 | 2.50 | 2.50 | 3.50 | 2.83 | Aluminum  | 60   | 86°F | 30°C |
| PRRSV MN 1-8-4    | 51 A-C | 5.62E+02 | 3.16E+03 | 3.16E+02 | 8.25E+02 | 2.75 | 3.50 | 2.50 | 2.92 | Cardboard | 360  | 86°F | 30°C |
| PRRSV MN 1-8-4    | 52 A-C | 5.62E+02 | 5.62E+02 | 1.78E+03 | 8.25E+02 | 2.75 | 2.75 | 3.25 | 2.92 | Aluminum  | 360  | 86°F | 30°C |
| PRRSV 1-4-4 L1C V | 53 A-C | 0.00E+00 | 0.00E+00 | 0.00E+00 | 0.00E+00 | 0.00 | 0.00 | 0.00 | 0.00 | Cardboard | 360  | 86°F | 30°C |
| PRRSV 1-4-4 L1C V | 54 A-C | 4.46E+02 | 1.78E+02 | 3.16E+02 | 2.93E+02 | 2.65 | 2.25 | 2.50 | 2.47 | Aluminum  | 360  | 86°F | 30°C |
| PRRSV MN 1-8-4    | 57 A-C | 0.00E+00 | 0.00E+00 | 0.00E+00 | 0.00E+00 | 0.00 | 0.00 | 0.00 | 0.00 | Cardboard | 1440 | 86°F | 30°C |
| PRRSV MN 1-8-4    | 58 A-C | 0.00E+00 | 0.00E+00 | 1.00E+01 | 2.15E+00 | 0.00 | 0.00 | 1.00 | 0.33 | Aluminum  | 1440 | 86°F | 30°C |
| PRRSV 1-4-4 L1C V | 59 A-C | 0.00E+00 | 0.00E+00 | 0.00E+00 | 0.00E+00 | 0.00 | 0.00 | 0.00 | 0.00 | Cardboard | 1440 | 86°F | 30°C |
| PRRSV 1-4-4 L1C V | 60 A-C | 0.00E+00 | 0.00E+00 | 0.00E+00 | 0.00E+00 | 0.00 | 0.00 | 0.00 | 0.00 | Aluminum  | 1440 | 86°F | 30°C |
| PRRSV MN 1-8-4    | 63 A-C | 0.00E+00 | 3.16E+01 | 1.78E+01 | 8.25E+00 | 0.00 | 1.50 | 1.25 | 0.92 | Cardboard | 720  | 86°F | 30°C |

|                       |        |          |          |          |          |      |      |      |      |           |      |       |      |
|-----------------------|--------|----------|----------|----------|----------|------|------|------|------|-----------|------|-------|------|
| PRRSV<br>MN 1-8-4     | 64 A-C | 0.00E+00 | 3.16E+01 | 5.62E+02 | 2.61E+01 | 0.00 | 1.50 | 2.75 | 1.42 | Aluminum  | 720  | 86°F  | 30°C |
| PRRSV 1-<br>4-4 L1C V | 65 A-C | 0.00E+00 | 0.00E+00 | 0.00E+00 | 0.00E+00 | 0.00 | 0.00 | 0.00 | 0.00 | Cardboard | 720  | 86°F  | 30°C |
| PRRSV 1-<br>4-4 L1C V | 66 A-C | 0.00E+00 | 0.00E+00 | 0.00E+00 | 0.00E+00 | 0.00 | 0.00 | 0.00 | 0.00 | Aluminum  | 720  | 86°F  | 30°C |
| PRRSV<br>MN 1-8-4     | 69 A-C | 0.00E+00 | 0.00E+00 | 1.00E+01 | 2.15E+00 | 0.00 | 0.00 | 1.00 | 0.33 | Cardboard | 2160 | 86°F  | 30°C |
| PRRSV<br>MN 1-8-4     | 70 A-C | 0.00E+00 | 0.00E+00 | 0.00E+00 | 0.00E+00 | 0.00 | 0.00 | 0.00 | 0.00 | Aluminum  | 2160 | 86°F  | 30°C |
| PRRSV 1-<br>4-4 L1C V | 71 A-C | 0.00E+00 | 0.00E+00 | 0.00E+00 | 0.00E+00 | 0.00 | 0.00 | 0.00 | 0.00 | Cardboard | 2160 | 86°F  | 30°C |
| PRRSV 1-<br>4-4 L1C V | 72 A-C | 0.00E+00 | 0.00E+00 | 0.00E+00 | 0.00E+00 | 0.00 | 0.00 | 0.00 | 0.00 | Aluminum  | 2160 | 86°F  | 30°C |
| PRRSV<br>MN 1-8-4     | 75 A-C | 3.16E+05 | 3.16E+04 | 1.78E+04 | 5.62E+04 | 5.50 | 4.50 | 4.25 | 4.75 | Cardboard | 15   | 104°F | 40°C |
| PRRSV<br>MN 1-8-4     | 76 A-C | 1.78E+04 | 1.78E+04 | 1.78E+04 | 1.78E+04 | 4.25 | 4.25 | 4.25 | 4.25 | Aluminum  | 15   | 104°F | 40°C |
| PRRSV 1-<br>4-4 L1C V | 77 A-C | 5.62E+02 | 1.78E+03 | 0.00E+00 | 1.00E+02 | 2.75 | 3.25 | 0.00 | 2.00 | Cardboard | 15   | 104°F | 40°C |
| PRRSV 1-<br>4-4 L1C V | 78 A-C | 3.16E+04 | 1.78E+04 | 3.16E+03 | 1.21E+04 | 4.50 | 4.25 | 3.50 | 4.08 | Aluminum  | 15   | 104°F | 40°C |
| PRRSV<br>MN 1-8-4     | 81 A-C | 3.16E+03 | 2.85E+04 | 3.16E+03 | 6.58E+03 | 3.50 | 4.45 | 3.50 | 3.82 | Cardboard | 60   | 104°F | 40°C |
| PRRSV<br>MN 1-8-4     | 82 A-C | 1.00E+04 | 3.16E+03 | 2.85E+03 | 4.48E+03 | 4.00 | 3.50 | 3.45 | 3.65 | Aluminum  | 60   | 104°F | 40°C |
| PRRSV 1-<br>4-4 L1C V | 83 A-C | 0.00E+00 | 5.62E+01 | 1.78E+02 | 2.15E+01 | 0.00 | 1.75 | 2.25 | 1.33 | Cardboard | 60   | 104°F | 40°C |
| PRRSV 1-<br>4-4 L1C V | 84 A-C | 5.62E+02 | 1.78E+02 | 5.62E+02 | 3.83E+02 | 2.75 | 2.25 | 2.75 | 2.58 | Aluminum  | 60   | 104°F | 40°C |
| PRRSV<br>MN 1-8-4     | 87 A-C | 4.64E+02 | 5.62E+02 | 5.62E+02 | 5.27E+02 | 2.67 | 2.75 | 2.75 | 2.72 | Cardboard | 360  | 104°F | 40°C |
| PRRSV<br>MN 1-8-4     | 88 A-C | 4.64E+01 | 5.62E+01 | 5.62E+02 | 1.14E+02 | 1.67 | 1.75 | 2.75 | 2.06 | Aluminum  | 360  | 104°F | 40°C |
| PRRSV 1-<br>4-4 L1C V | 89 A-C | 0.00E+00 | 0.00E+00 | 0.00E+00 | 0.00E+00 | 0.00 | 0.00 | 0.00 | 0.00 | Cardboard | 360  | 104°F | 40°C |
| PRRSV 1-<br>4-4 L1C V | 90 A-C | 0.00E+00 | 0.00E+00 | 0.00E+00 | 0.00E+00 | 0.00 | 0.00 | 0.00 | 0.00 | Aluminum  | 360  | 104°F | 40°C |
| PRRSV<br>MN 1-8-4     | 93 A-C | 0.00E+00 | 0.00E+00 | 0.00E+00 | 0.00E+00 | 0.00 | 0.00 | 0.00 | 0.00 | Cardboard | 1440 | 104°F | 40°C |
| PRRSV<br>MN 1-8-4     | 94 A-C | 0.00E+00 | 0.00E+00 | 0.00E+00 | 0.00E+00 | 0.00 | 0.00 | 0.00 | 0.00 | Aluminum  | 1440 | 104°F | 40°C |
| PRRSV 1-<br>4-4 L1C V | 95 A-C | 0.00E+00 | 0.00E+00 | 0.00E+00 | 0.00E+00 | 0.00 | 0.00 | 0.00 | 0.00 | Cardboard | 1440 | 104°F | 40°C |
| PRRSV 1-<br>4-4 L1C V | 96 A-C | 0.00E+00 | 0.00E+00 | 0.00E+00 | 0.00E+00 | 0.00 | 0.00 | 0.00 | 0.00 | Aluminum  | 1440 | 104°F | 40°C |

|                       |            |          |          |          |          |      |      |      |      |           |      |       |      |
|-----------------------|------------|----------|----------|----------|----------|------|------|------|------|-----------|------|-------|------|
| PRRSV<br>MN 1-8-4     | 99 A-C     | 0.00E+00 | 0.00E+00 | 0.00E+00 | 0.00E+00 | 0.00 | 0.00 | 0.00 | 0.00 | Cardboard | 720  | 104°F | 40°C |
| PRRSV<br>MN 1-8-4     | 100<br>A-C | 0.00E+00 | 0.00E+00 | 0.00E+00 | 0.00E+00 | 0.00 | 0.00 | 0.00 | 0.00 | Aluminum  | 720  | 104°F | 40°C |
| PRRSV 1-<br>4-4 L1C V | 101<br>A-C | 0.00E+00 | 0.00E+00 | 0.00E+00 | 0.00E+00 | 0.00 | 0.00 | 0.00 | 0.00 | Cardboard | 720  | 104°F | 40°C |
| PRRSV 1-<br>4-4 L1C V | 102<br>A-C | 0.00E+00 | 0.00E+00 | 0.00E+00 | 0.00E+00 | 0.00 | 0.00 | 0.00 | 0.00 | Aluminum  | 720  | 104°F | 40°C |
| PRRSV<br>MN 1-8-4     | 105<br>A-C | 0.00E+00 | 0.00E+00 | 0.00E+00 | 0.00E+00 | 0.00 | 0.00 | 0.00 | 0.00 | Cardboard | 2160 | 104°F | 40°C |
| PRRSV<br>MN 1-8-4     | 106<br>A-C | 0.00E+00 | 0.00E+00 | 0.00E+00 | 0.00E+00 | 0.00 | 0.00 | 0.00 | 0.00 | Aluminum  | 2160 | 104°F | 40°C |
| PRRSV 1-<br>4-4 L1C V | 107<br>A-C | 0.00E+00 | 0.00E+00 | 0.00E+00 | 0.00E+00 | 0.00 | 0.00 | 0.00 | 0.00 | Cardboard | 2160 | 104°F | 40°C |
| PRRSV 1-<br>4-4 L1C V | 108<br>A-C | 0.00E+00 | 0.00E+00 | 0.00E+00 | 0.00E+00 | 0.00 | 0.00 | 0.00 | 0.00 | Aluminum  | 2160 | 104°F | 40°C |
| PRRSV<br>MN 1-8-4     | 111<br>A-C | 3.16E+03 | 1.78E+04 | 4.64E+03 | 6.39E+03 | 3.50 | 4.25 | 3.67 | 3.81 | Cardboard | 15   | 122°F | 50°C |
| PRRSV<br>MN 1-8-4     | 112<br>A-C | 3.16E+03 | 3.16E+04 | 5.62E+03 | 8.25E+03 | 3.50 | 4.50 | 3.75 | 3.92 | Aluminum  | 15   | 122°F | 50°C |
| PRRSV 1-<br>4-4 L1C V | 113<br>A-C | 5.62E+03 | 3.16E+03 | 5.62E+02 | 2.15E+03 | 3.75 | 3.50 | 2.75 | 3.33 | Cardboard | 15   | 122°F | 50°C |
| PRRSV 1-<br>4-4 L1C V | 114<br>A-C | 0.00E+00 | 0.00E+00 | 0.00E+00 | 0.00E+00 | 0.00 | 0.00 | 0.00 | 0.00 | Aluminum  | 15   | 122°F | 50°C |
| PRRSV<br>MN 1-8-4     | 117<br>A-C | 1.78E+03 | 5.62E+03 | 3.16E+04 | 6.81E+03 | 3.25 | 3.75 | 4.50 | 3.83 | Cardboard | 60   | 122°F | 50°C |
| PRRSV<br>MN 1-8-4     | 118<br>A-C | 3.16E+01 | 3.16E+02 | 3.16E+01 | 6.81E+01 | 1.50 | 2.50 | 1.50 | 1.83 | Aluminum  | 60   | 122°F | 50°C |
| PRRSV 1-<br>4-4 L1C V | 119<br>A-C | 3.16E+01 | 0.00E+00 | 1.00E+02 | 1.47E+01 | 1.50 | 0.00 | 2.00 | 1.17 | Cardboard | 60   | 122°F | 50°C |
| PRRSV 1-<br>4-4 L1C V | 120<br>A-C | 0.00E+00 | 0.00E+00 | 0.00E+00 | 0.00E+00 | 0.00 | 0.00 | 0.00 | 0.00 | Aluminum  | 60   | 122°F | 50°C |
| PRRSV<br>MN 1-8-4     | 123<br>A-C | 5.62E+02 | 3.16E+02 | 1.78E+03 | 6.81E+02 | 2.75 | 2.50 | 3.25 | 2.83 | Cardboard | 360  | 122°F | 50°C |
| PRRSV<br>MN 1-8-4     | 124<br>A-C | 0.00E+00 | 0.00E+00 | 0.00E+00 | 0.00E+00 | 0.00 | 0.00 | 0.00 | 0.00 | Aluminum  | 360  | 122°F | 50°C |
| PRRSV 1-<br>4-4 L1C V | 125<br>A-C | 0.00E+00 | 0.00E+00 | 0.00E+00 | 0.00E+00 | 0.00 | 0.00 | 0.00 | 0.00 | Cardboard | 360  | 122°F | 50°C |
| PRRSV 1-<br>4-4 L1C V | 126<br>A-C | 0.00E+00 | 0.00E+00 | 0.00E+00 | 0.00E+00 | 0.00 | 0.00 | 0.00 | 0.00 | Aluminum  | 360  | 122°F | 50°C |
| PRRSV<br>MN 1-8-4     | 129<br>A-C | 0.00E+00 | 0.00E+00 | 0.00E+00 | 0.00E+00 | 0.00 | 0.00 | 0.00 | 0.00 | Cardboard | 1440 | 122°F | 50°C |
| PRRSV<br>MN 1-8-4     | 130<br>A-C | 0.00E+00 | 0.00E+00 | 0.00E+00 | 0.00E+00 | 0.00 | 0.00 | 0.00 | 0.00 | Aluminum  | 1440 | 122°F | 50°C |
| PRRSV 1-<br>4-4 L1C V | 131<br>A-C | 0.00E+00 | 0.00E+00 | 0.00E+00 | 0.00E+00 | 0.00 | 0.00 | 0.00 | 0.00 | Cardboard | 1440 | 122°F | 50°C |

|                   |     |          |          |          |          |      |      |      |      |           |      |       |      |
|-------------------|-----|----------|----------|----------|----------|------|------|------|------|-----------|------|-------|------|
| PRRSV 1-4-4 L1C V | 132 | 0.00E+00 | 0.00E+00 | 0.00E+00 | 0.00E+00 | 0.00 | 0.00 | 0.00 | 0.00 | Aluminum  | 1440 | 122°F | 50°C |
| PRRSV MN 1-8-4    | 135 | 0.00E+00 | 0.00E+00 | 0.00E+00 | 0.00E+00 | 0.00 | 0.00 | 0.00 | 0.00 | Cardboard | 720  | 122°F | 50°C |
| PRRSV MN 1-8-4    | 136 | 0.00E+00 | 0.00E+00 | 0.00E+00 | 0.00E+00 | 0.00 | 0.00 | 0.00 | 0.00 | Aluminum  | 720  | 122°F | 50°C |
| PRRSV 1-4-4 L1C V | 137 | 0.00E+00 | 0.00E+00 | 0.00E+00 | 0.00E+00 | 0.00 | 0.00 | 0.00 | 0.00 | Cardboard | 720  | 122°F | 50°C |
| PRRSV 1-4-4 L1C V | 138 | 0.00E+00 | 0.00E+00 | 0.00E+00 | 0.00E+00 | 0.00 | 0.00 | 0.00 | 0.00 | Aluminum  | 720  | 122°F | 50°C |
| PRRSV MN 1-8-4    | 141 | 0.00E+00 | 0.00E+00 | 0.00E+00 | 0.00E+00 | 0.00 | 0.00 | 0.00 | 0.00 | Cardboard | 2160 | 122°F | 50°C |
| PRRSV MN 1-8-4    | 142 | 0.00E+00 | 0.00E+00 | 0.00E+00 | 0.00E+00 | 0.00 | 0.00 | 0.00 | 0.00 | Aluminum  | 2160 | 122°F | 50°C |
| PRRSV 1-4-4 L1C V | 143 | 0.00E+00 | 0.00E+00 | 0.00E+00 | 0.00E+00 | 0.00 | 0.00 | 0.00 | 0.00 | Cardboard | 2160 | 122°F | 50°C |
| PRRSV 1-4-4 L1C V | 144 | 0.00E+00 | 0.00E+00 | 0.00E+00 | 0.00E+00 | 0.00 | 0.00 | 0.00 | 0.00 | Aluminum  | 2160 | 122°F | 50°C |

PRRSV MN 1-8-4 and PRRSV 1-4-4 L1C Variant titration results per surface, contact time and temperature.
