# Supplementary material for: Assessment of temperature and time on the survivability of porcine reproductive and respiratory syndrome virus (PRRSV) and porcine epidemic diarrhea virus (PEDV) on experimentally contaminated surfaces
Source: PubMed Central journal article supplement (PMC10798431; doi:10.1371/journal.pone.0291181), 2024-01-19
Supplement: pone.0291181.s002.pdf [file pone.0291181.s002.pdf]

**S2 Table. PEDV titration results.**

| Study group      | Series # | ATCID    | BTCID    | CTCID    | Average TCID | A LOG | B LOG | C LOG | Average LOG | Surface   | Contact time (min) | Temperature (°F) | Temperature (°C) |
|------------------|----------|----------|----------|----------|--------------|-------|-------|-------|-------------|-----------|--------------------|------------------|------------------|
| Negative Control | 1 A-C    | 0.00E+00 | 0.00E+00 | 0.00E+00 | 0.00E+00     | 0.00  | 0.00  | 0.00  | 0.00        | Cardboard | 2160               | 68°F             | 20°C             |
| Negative Control | 2 A-C    | 0.00E+00 | 0.00E+00 | 0.00E+00 | 0.00E+00     | 0.00  | 0.00  | 0.00  | 0.00        | Aluminum  | 2160               | 68°F             | 20°C             |
| PEDV             | 7 A-C    | 3.16E+04 | 3.16E+04 | 5.62E+04 | 3.83E+04     | 4.50  | 4.50  | 4.75  | 4.58        | Cardboard | 15                 | 68°F             | 20°C             |
| PEDV             | 8 A-C    | 1.00E+06 | 1.00E+05 | 3.16E+05 | 3.16E+05     | 6.00  | 5.00  | 5.50  | 5.50        | Aluminum  | 15                 | 68°F             | 20°C             |
| PEDV             | 13 A-C   | 1.78E+04 | 1.78E+04 | 1.78E+05 | 3.83E+04     | 4.25  | 4.25  | 5.25  | 4.58        | Cardboard | 60                 | 68°F             | 20°C             |
| PEDV             | 14 A-C   | 1.78E+05 | 5.62E+04 | 3.16E+04 | 6.81E+04     | 5.25  | 4.75  | 4.50  | 4.83        | Aluminum  | 60                 | 68°F             | 20°C             |
| PEDV             | 19 A-C   | 1.00E+04 | 1.00E+04 | 3.16E+03 | 6.81E+03     | 4.00  | 4.00  | 3.50  | 3.83        | Cardboard | 360                | 68°F             | 20°C             |
| PEDV             | 20 A-C   | 1.78E+03 | 1.78E+04 | 1.78E+04 | 8.26E+03     | 3.25  | 4.25  | 4.25  | 3.92        | Aluminum  | 360                | 68°F             | 20°C             |
| PEDV             | 25 A-C   | 5.62E+01 | 3.16E+02 | 3.16E+01 | 8.25E+01     | 1.75  | 2.50  | 1.50  | 1.92        | Cardboard | 1440               | 68°F             | 20°C             |
| PEDV             | 26 A-C   | 3.16E+02 | 5.62E+02 | 5.62E+02 | 4.64E+02     | 2.50  | 2.75  | 2.75  | 2.67        | Aluminum  | 1440               | 68°F             | 20°C             |
| PEDV             | 31 A-C   | 5.62E+01 | 3.16E+01 | 1.78E+02 | 6.81E+01     | 1.75  | 1.50  | 2.25  | 1.83        | Cardboard | 720                | 68°F             | 20°C             |
| PEDV             | 32 A-C   | 5.62E+02 | 3.16E+02 | 5.62E+03 | 9.99E+02     | 2.75  | 2.50  | 3.75  | 3.00        | Aluminum  | 720                | 68°F             | 20°C             |
| PEDV             | 37 A-C   | 3.16E+01 | 3.16E+01 | 3.16E+02 | 6.81E+01     | 1.50  | 1.50  | 2.50  | 1.83        | Cardboard | 2160               | 68°F             | 20°C             |
| PEDV             | 38 A-C   | 3.16E+01 | 1.00E+01 | 0.00E+00 | 6.81E+00     | 1.50  | 1.00  | 0.00  | 0.83        | Aluminum  | 2160               | 68°F             | 20°C             |
| PEDV             | 43 A-C   | 1.78E+03 | 5.62E+03 | 3.16E+03 | 3.16E+03     | 3.25  | 3.75  | 3.50  | 3.50        | Cardboard | 15                 | 86°F             | 30°C             |
| PEDV             | 44 A-C   | 3.16E+03 | 5.62E+03 | 3.16E+03 | 3.83E+03     | 3.50  | 3.75  | 3.50  | 3.58        | Aluminum  | 15                 | 86°F             | 30°C             |
| PEDV             | 49 A-C   | 3.16E+02 | 5.62E+01 | 4.64E+02 | 2.02E+02     | 2.50  | 1.75  | 2.67  | 2.31        | Cardboard | 60                 | 86°F             | 30°C             |
| PEDV             | 50 A-C   | 1.78E+02 | 5.62E+01 | 3.16E+02 | 1.47E+02     | 2.25  | 1.75  | 2.50  | 2.17        | Aluminum  | 60                 | 86°F             | 30°C             |
| PEDV             | 55 A-C   | 0.00E+00 | 0.00E+00 | 5.62E+01 | 3.83E+00     | 0.00  | 0.00  | 1.75  | 0.58        | Cardboard | 360                | 86°F             | 30°C             |
| PEDV             | 56 A-C   | 0.00E+00 | 0.00E+00 | 0.00E+00 | 0.00E+00     | 0.00  | 0.00  | 0.00  | 0.00        | Aluminum  | 360                | 86°F             | 30°C             |
| PEDV             | 61 A-C   | 0.00E+00 | 0.00E+00 | 0.00E+00 | 0.00E+00     | 0.00  | 0.00  | 0.00  | 0.00        | Cardboard | 1440               | 86°F             | 30°C             |

|      |            |          |          |          |          |      |      |      |      |           |      |       |      |
|------|------------|----------|----------|----------|----------|------|------|------|------|-----------|------|-------|------|
| PEDV | 62<br>A-C  | 0.00E+00 | 0.00E+00 | 0.00E+00 | 0.00E+00 | 0.00 | 0.00 | 0.00 | 0.00 | Aluminum  | 1440 | 86°F  | 30°C |
| PEDV | 67<br>A-C  | 0.00E+00 | 0.00E+00 | 0.00E+00 | 0.00E+00 | 0.00 | 0.00 | 0.00 | 0.00 | Cardboard | 720  | 86°F  | 30°C |
| PEDV | 68<br>A-C  | 0.00E+00 | 0.00E+00 | 0.00E+00 | 0.00E+00 | 0.00 | 0.00 | 0.00 | 0.00 | Aluminum  | 720  | 86°F  | 30°C |
| PEDV | 73<br>A-C  | 0.00E+00 | 0.00E+00 | 0.00E+00 | 0.00E+00 | 0.00 | 0.00 | 0.00 | 0.00 | Cardboard | 2160 | 86°F  | 30°C |
| PEDV | 74<br>A-C  | 0.00E+00 | 0.00E+00 | 0.00E+00 | 0.00E+00 | 0.00 | 0.00 | 0.00 | 0.00 | Aluminum  | 2160 | 86°F  | 30°C |
| PEDV | 79<br>A-C  | 5.62E+03 | 5.62E+02 | 3.16E+03 | 2.15E+03 | 3.75 | 2.75 | 3.50 | 3.33 | Cardboard | 15   | 104°F | 40°C |
| PEDV | 80<br>A-C  | 3.16E+03 | 3.16E+02 | 3.16E+02 | 6.81E+02 | 3.50 | 2.50 | 2.50 | 2.83 | Aluminum  | 15   | 104°F | 40°C |
| PEDV | 85<br>A-C  | 3.16E+03 | 1.78E+03 | 3.16E+01 | 5.62E+02 | 3.50 | 3.25 | 1.50 | 2.75 | Cardboard | 60   | 104°F | 40°C |
| PEDV | 86<br>A-C  | 3.16E+02 | 3.16E+02 | 1.78E+03 | 5.62E+02 | 2.50 | 2.50 | 3.25 | 2.75 | Aluminum  | 60   | 104°F | 40°C |
| PEDV | 91<br>A-C  | 3.16E+01 | 0.00E+00 | 3.16E+01 | 1.00E+01 | 1.50 | 0.00 | 1.50 | 1.00 | Cardboard | 360  | 104°F | 40°C |
| PEDV | 92<br>A-C  | 0.00E+00 | 0.00E+00 | 0.00E+00 | 0.00E+00 | 0.00 | 0.00 | 0.00 | 0.00 | Aluminum  | 360  | 104°F | 40°C |
| PEDV | 97<br>A-C  | 0.00E+00 | 0.00E+00 | 0.00E+00 | 0.00E+00 | 0.00 | 0.00 | 0.00 | 0.00 | Cardboard | 1440 | 104°F | 40°C |
| PEDV | 98<br>A-C  | 0.00E+00 | 0.00E+00 | 0.00E+00 | 0.00E+00 | 0.00 | 0.00 | 0.00 | 0.00 | Aluminum  | 1440 | 104°F | 40°C |
| PEDV | 103<br>A-C | 0.00E+00 | 0.00E+00 | 0.00E+00 | 0.00E+00 | 0.00 | 0.00 | 0.00 | 0.00 | Cardboard | 720  | 104°F | 40°C |
| PEDV | 104<br>A-C | 0.00E+00 | 0.00E+00 | 0.00E+00 | 0.00E+00 | 0.00 | 0.00 | 0.00 | 0.00 | Aluminum  | 720  | 104°F | 40°C |
| PEDV | 109<br>A-C | 0.00E+00 | 0.00E+00 | 0.00E+00 | 0.00E+00 | 0.00 | 0.00 | 0.00 | 0.00 | Cardboard | 2160 | 104°F | 40°C |
| PEDV | 110<br>A-C | 0.00E+00 | 0.00E+00 | 0.00E+00 | 0.00E+00 | 0.00 | 0.00 | 0.00 | 0.00 | Aluminum  | 2160 | 104°F | 40°C |
| PEDV | 115<br>A-C | 1.78E+03 | 5.62E+03 | 1.78E+03 | 2.61E+03 | 3.25 | 3.75 | 3.25 | 3.42 | Cardboard | 15   | 122°F | 50°C |
| PEDV | 116<br>A-C | 0.00E+00 | 0.00E+00 | 0.00E+00 | 0.00E+00 | 0.00 | 0.00 | 0.00 | 0.00 | Aluminum  | 15   | 122°F | 50°C |
| PEDV | 121<br>A-C | 5.62E+01 | 3.16E+01 | 3.16E+01 | 3.83E+01 | 1.75 | 1.50 | 1.50 | 1.58 | Cardboard | 60   | 122°F | 50°C |
| PEDV | 122<br>A-C | 0.00E+00 | 0.00E+00 | 0.00E+00 | 0.00E+00 | 0.00 | 0.00 | 0.00 | 0.00 | Aluminum  | 60   | 122°F | 50°C |
| PEDV | 127<br>A-C | 0.00E+00 | 0.00E+00 | 3.16E+01 | 3.16E+00 | 0.00 | 0.00 | 1.50 | 0.50 | Cardboard | 360  | 122°F | 50°C |
| PEDV | 128<br>A-C | 0.00E+00 | 0.00E+00 | 0.00E+00 | 0.00E+00 | 0.00 | 0.00 | 0.00 | 0.00 | Aluminum  | 360  | 122°F | 50°C |

|      |            |          |          |          |          |      |      |      |      |           |      |       |      |
|------|------------|----------|----------|----------|----------|------|------|------|------|-----------|------|-------|------|
| PEDV | 133<br>A-C | 0.00E+00 | 0.00E+00 | 0.00E+00 | 0.00E+00 | 0.00 | 0.00 | 0.00 | 0.00 | Cardboard | 1440 | 122°F | 50°C |
| PEDV | 134<br>A-C | 0.00E+00 | 0.00E+00 | 0.00E+00 | 0.00E+00 | 0.00 | 0.00 | 0.00 | 0.00 | Aluminum  | 1440 | 122°F | 50°C |
| PEDV | 139<br>A-C | 0.00E+00 | 0.00E+00 | 0.00E+00 | 0.00E+00 | 0.00 | 0.00 | 0.00 | 0.00 | Cardboard | 720  | 122°F | 50°C |
| PEDV | 140<br>A-C | 0.00E+00 | 0.00E+00 | 0.00E+00 | 0.00E+00 | 0.00 | 0.00 | 0.00 | 0.00 | Aluminum  | 720  | 122°F | 50°C |
| PEDV | 145<br>A-C | 0.00E+00 | 1.78E+01 | 0.00E+00 | 0.00E+00 | 0.00 | 0.00 | 0.00 | 0.00 | Cardboard | 2160 | 122°F | 50°C |
| PEDV | 146<br>A-C | 0.00E+00 | 0.00E+00 | 0.00E+00 | 0.00E+00 | 0.00 | 0.00 | 0.00 | 0.00 | Aluminum  | 2160 | 122°F | 50°C |

Results of PEDV titrations per surface, contact time and temperature.
